# Supplementary material for: Multi-phase real-time monitoring of oxygen evolution enables in operando water oxidation catalysis studies
Source: Royal Society of Chemistry journal article supplement (doi:10.1039/c8se00328a), 2018-01-01
Supplement: c8se00328a1.pdf [file c8se00328a1.pdf]

**ELECTRONIC SUPPLEMENTARY INFORMATION**

**Multi-phase real-time monitoring of oxygen evolution enables *in operando* water  
oxidation catalysis studies**

Fabian L. Huber, Sebastian Amthor, Benjamin Schwarz, Boris Mizaikoff, Carsten Streb\* and Sven Rau\*

|                                                                                                      |    |
|------------------------------------------------------------------------------------------------------|----|
| 1. Experimental Procedures .....                                                                     | 2  |
| 2. Turnover Frequencies ( <i>TOFs</i> ) and total O <sub>2</sub> amounts of the studied systems..... | 4  |
| 3. Proposed Mechanism of Cl <sup>-</sup> Poisoning.....                                              | 6  |
| 4. Reference Measurements .....                                                                      | 7  |
| 5. Influence of Stirring.....                                                                        | 9  |
| 6. Reproduction of Measurements .....                                                                | 10 |
| 7. Literature .....                                                                                  | 11 |

# 1. Experimental Procedures

**Synthesis:**  $[\text{Ru}(\text{dpp})(\text{pic})](\text{PF}_6)_2$ ,<sup>1</sup>  $[\text{Ru}(\text{dceb})_2(\text{bpy})](\text{PF}_6)_2$  and  $[\text{Mn}_4\text{V}_4\text{O}_{17}(\text{OAc})_3]^{3-3}$  were prepared according to published syntheses.

**Photochemical water oxidation catalysis:** all studies were carried out in de-aerated solvents under inert atmosphere. All catalytic experiments were tempered by a custom air cooling setup (25 °C, Fig S1). A screw cap, hermetically sealed vial (diameter:  $12.75 \pm 0.25$  mm, length:  $99.00 \pm 0.50$  mm) equipped with two sensor spots (see "Oxygen detection" below) was used as reaction vessel. The mixtures were not stirred during catalysis, unless mentioned otherwise.

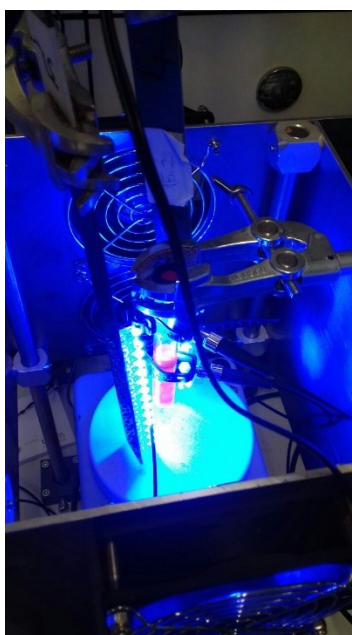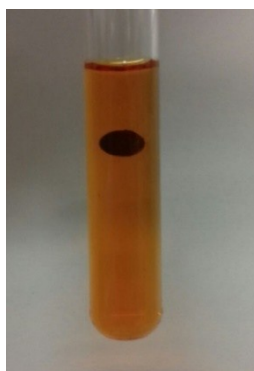

**Figure S1.** Top: Sealed reaction vessel equipped with oxygen sensor spots, mounted inside in a custom air cooling reactor. Bottom: Catalytic solution, containing  $[\text{Ru}(\text{dpp})(\text{pic})_2](\text{PF}_6)_2$  (2.6  $\mu\text{M}$ ) as catalyst and  $[\text{Ru}(\text{dceb})_2(\text{bpy})](\text{PF}_6)_2$  (0.3 mM) as photosensitizer.

**Oxygen detection:** Oxygen concentrations were determined using a FireStingO2 optical oxygen meter (Pyroscience, Germany) using oxygen sensitive optical sensor spots (OXSP5, with optical isolation). The spots were glued to the inner glass vessel wall of a screw-capped vial (transparent silicone glue, SPGLUE). The sensor spots are stable between pH 1 – 14, stable in the presence of strong oxidants (the manufacturer suggests cleaning in 3 % aqueous  $\text{H}_2\text{O}_2$ ), are not affected by the solvents used (as shown by repeated reproducible catalytic measurements) and are autoclavable at 120 °C. For further information, see the manufacturer information: <https://www.pyro-science.com/contactless-fiber-optic-oxygen-sensor-spots.html>.  $\text{O}_2$  concentration was measured in  $\mu\text{mol/L}$  (solution) and mbar (gas-phase). Both spots were calibrated by two-point calibration: gas-phase calibration was performed against ambient air and Ar-atmosphere. Liquid-phase calibration was performed using a de-oxygenated reaction solution (aqueous sodium dithionite for Ru-WOC; de-aerated MeCN/ $\text{H}_2\text{O}$  solution for  $\{\text{Mn}_4\text{V}_4\}$ ). Solution *TONs* were calculated based on the detected concentration; gas-phase *TONs* were calculated *via* the ideal gas equation.

**Irradiation setup:** Irradiation of the samples was performed utilizing two LED-sticks ( $\lambda_{\max} = 470 \text{ nm}$ , power density at the sample ca.  $50 \text{ mW cm}^{-2}$  as determined using a power meter, also see Fig S2). Both sticks were placed on opposite sides of the reaction vessel.

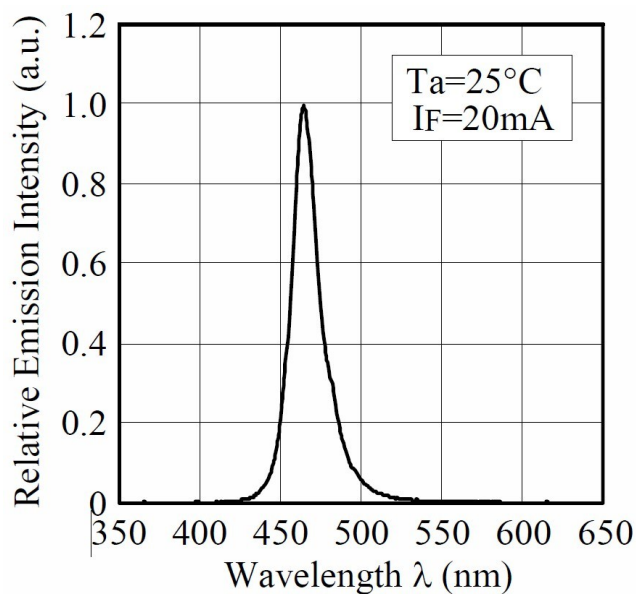

**Figure S2.** Emission spectrum of the LEDs used as irradiation source.

**Ru-WOC catalysis:**  $[\text{Ru}(\text{dpp})(\text{pic})_2](\text{PF}_6)_2$  ( $2.6 \mu\text{M}$ ), photosensitizer ( $0.3 \text{ mM}$ ,  $[\text{Ru}(\text{bpy})_2](\text{PF}_6)_2$ ,  $[\text{Ru}(\text{bpy})_2]\text{Cl}_2$  or  $[\text{Ru}(\text{dceb})_2(\text{bpy})](\text{PF}_6)_2$ ) and  $\text{Na}_2\text{S}_2\text{O}_8$  ( $10 \text{ mM}$ ) were dissolved in a  $\text{Na}_2\text{SiF}_6/\text{NaHCO}_3$  aqueous buffer ( $\text{pH } 6.8$ ,  $0.01 \text{ M}$   $\text{Na}_2\text{SiF}_6$ ,  $5 \text{ mL}$  containing  $70 \mu\text{L}$   $\text{MeCN}$ ). The solutions were kept in sealed glass GC vial equipped with two sensor “spots”.

**{Mn<sub>4</sub>V<sub>4</sub>} catalysis:**  $[\text{Mn}_4\text{V}_4\text{O}_{17}(\text{OAc})_3]^{3-}$  ( $0.3 \mu\text{M}$ ), the photosensitizer ( $1.0 \text{ mM}$ ,  $[\text{Ru}(\text{bpy})_2](\text{PF}_6)_2$ ,  $[\text{Ru}(\text{bpy})_2]\text{Cl}_2$ ) and  $\text{Na}_2\text{S}_2\text{O}_8$  ( $10 \text{ mM}$ ) are dissolved in  $\text{MeCN}/\text{H}_2\text{O}$  ( $9:1$ , v:v). The homogenous solutions were irradiated with LED light sources ( $\lambda_{\max} = 470 \text{ nm}$ , ca.  $50 \text{ mW cm}^{-2}$ ).

## 2. Turnover Frequencies (TOFs) and total O<sub>2</sub> amounts of the studied systems

Turnover frequencies were independently calculated from the TONs obtained from the oxygen measurement in the gas and the liquid phase. The total TOF is based on the measurements in the gas phase and the solution.

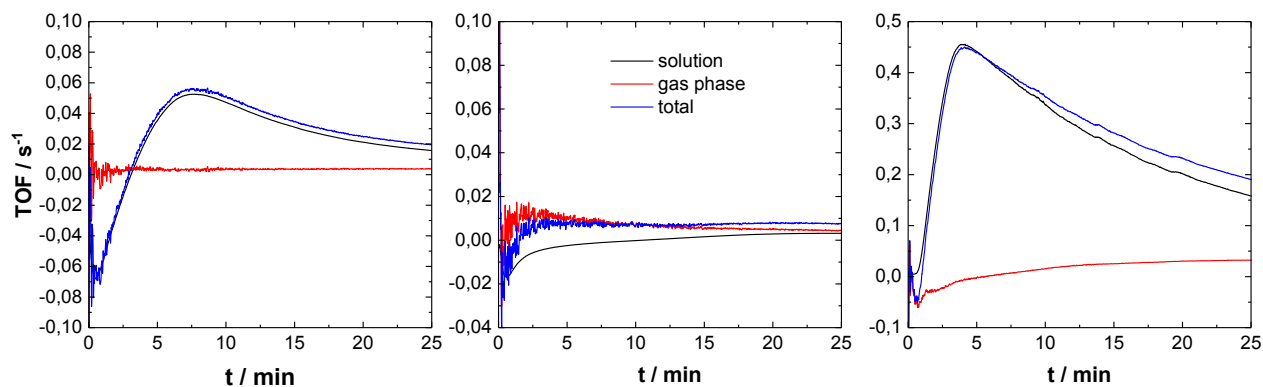

**Figure S3.** TOF of the light-driven oxygen evolution of the Ru-WOC system utilizing different photosensitizers. **Left:** [Ru(bpy)<sub>3</sub>](PF<sub>6</sub>)<sub>2</sub>. **Center:** [Ru(bpy)<sub>3</sub>]Cl<sub>2</sub>. **Right:** [Ru(dceb)<sub>2</sub>(bpy)](PF<sub>6</sub>)<sub>2</sub>. Catalyst TONs were calculated based on the oxygen detected in solution and gas phase using eq. 2. Conditions: Ru-WOC = 2.6 μM; PS = 0.3 mM; Na<sub>2</sub>S<sub>2</sub>O<sub>8</sub> = 10 mM. Solvent: aqueous Na<sub>2</sub>SiF<sub>6</sub>/NaHCO<sub>3</sub> buffer, pH 6.8, 0.01 M Na<sub>2</sub>SiF<sub>6</sub>. Irradiation: LED, λ<sub>max</sub> = 470 nm, ca. 50 mW cm<sup>-2</sup>.

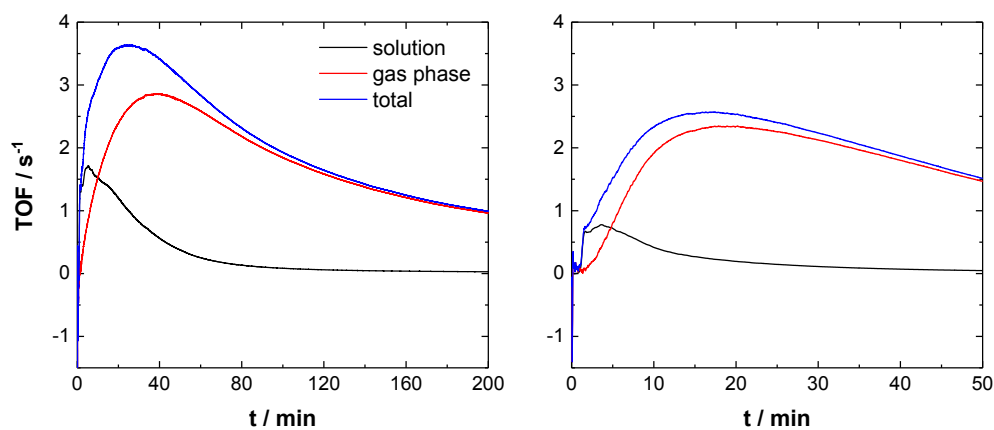

**Figure S4.** TOF of the light-driven O<sub>2</sub> evolution based on measurements in solution and gas-phase for the {Mn<sub>4</sub>V<sub>4</sub>} system. **Left:** chloride-free system using the photosensitizer [Ru(bpy)<sub>3</sub>](PF<sub>6</sub>)<sub>2</sub>. **Right:** chloride-containing system using the photosensitizer [Ru(bpy)<sub>3</sub>]Cl<sub>2</sub>. Conditions: {Mn<sub>4</sub>V<sub>4</sub>} = 0.3 μM, PS = 1 mM, Na<sub>2</sub>S<sub>2</sub>O<sub>8</sub> = 10 mM in MeCN / H<sub>2</sub>O (9:1) using LED irradiation (λ<sub>max</sub> = 470 nm, ca. 50 mW cm<sup>-2</sup>).

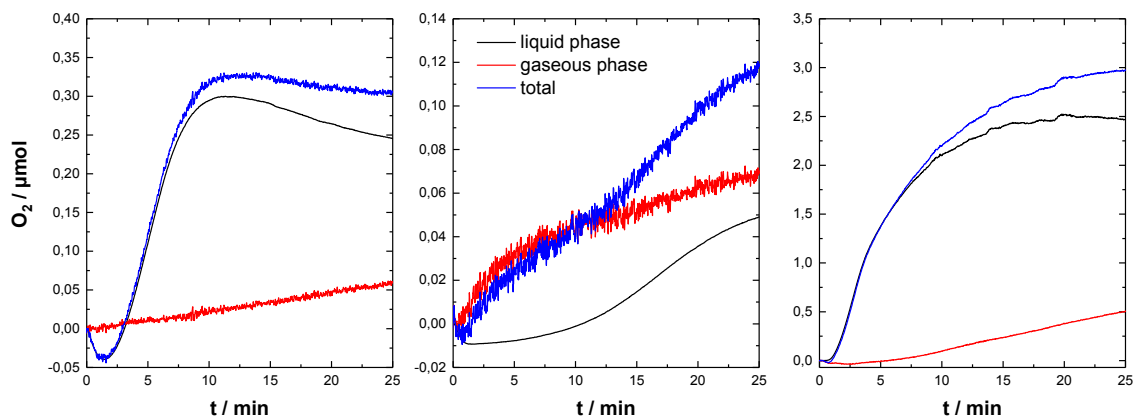

**Figure S5.** Amount of oxygen produced during light-driven water oxidation of the **Ru-WOC** system utilizing different photosensitizers. **Left:**  $[\text{Ru}(\text{bpy})_3](\text{PF}_6)_2$ . **Center:**  $[\text{Ru}(\text{bpy})_3]\text{Cl}_2$ . **Right:**  $[\text{Ru}(\text{dceb})_2(\text{bpy})](\text{PF}_6)_2$ . Conditions: **Ru-WOC** = 2.6  $\mu\text{M}$ ; PS = 0.3 mM;  $\text{Na}_2\text{S}_2\text{O}_8$  = 10 mM. Solvent: aqueous  $\text{Na}_2\text{SiF}_6/\text{NaHCO}_3$  buffer, pH 6.8, 0.01 M  $\text{Na}_2\text{SiF}_6$ . Irradiation: LED,  $\lambda_{\text{max}}$  = 470 nm, ca. 50  $\text{mW cm}^{-2}$ .

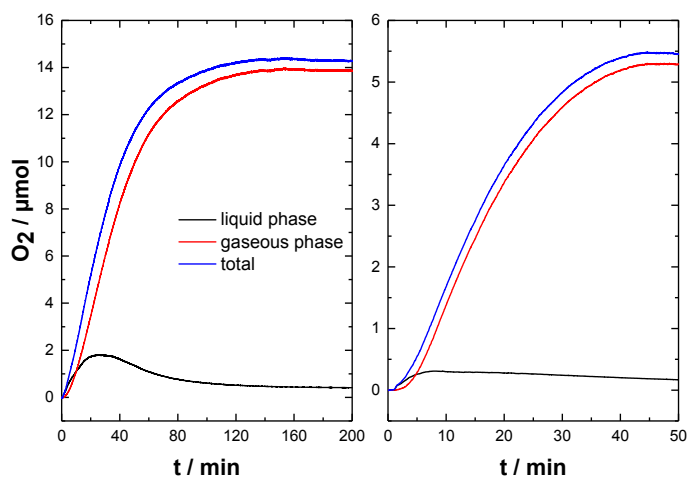

**Figure S6.** Amount of oxygen produced during light-driven water oxidation based on measurements in solution and gas-phase for the **{Mn<sub>4</sub>V<sub>4</sub>}** system. **Left:** chloride-free system using the photosensitizer  $[\text{Ru}(\text{bpy})_3](\text{PF}_6)_2$ . **Right:** chloride-containing system using the photosensitizer  $[\text{Ru}(\text{bpy})_3]\text{Cl}_2$ . Conditions: **{Mn<sub>4</sub>V<sub>4</sub>}** = 0.3  $\mu\text{M}$ , PS = 1 mM,  $\text{Na}_2\text{S}_2\text{O}_8$  = 10 mM in MeCN /  $\text{H}_2\text{O}$  (9:1) using LED irradiation ( $\lambda_{\text{max}}$  = 470 nm, ca. 50  $\text{mW cm}^{-2}$ ).

### 3. Proposed Mechanism of Cl<sup>-</sup> Poisoning

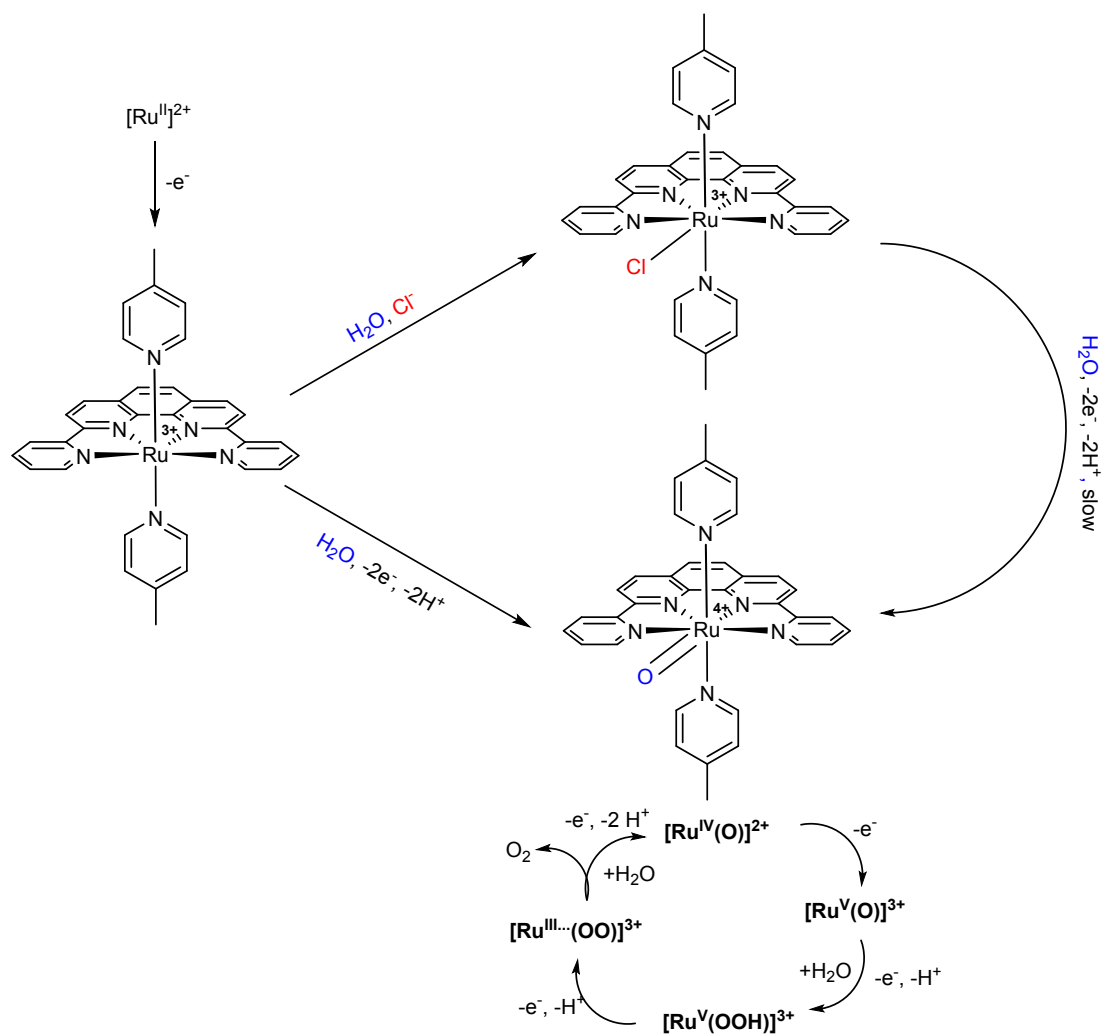

**Figure S7.** Possible mechanism of poisoning by chloride based on mechanistic studies by Thummel *et al.*<sup>4</sup>

## 4. Reference Measurements

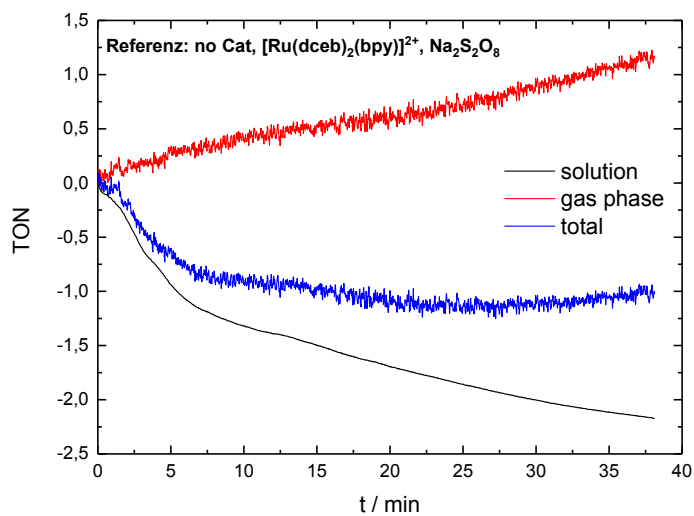

**Figure S8.** Negligible O<sub>2</sub>-evolution upon irradiation of a catalyst-free mixture containing [(Ru(dceb)<sub>2</sub>(bpy))(PF<sub>6</sub>)<sub>2</sub>] (0.3 mM) and Na<sub>2</sub>S<sub>2</sub>O<sub>8</sub> (10 mM).

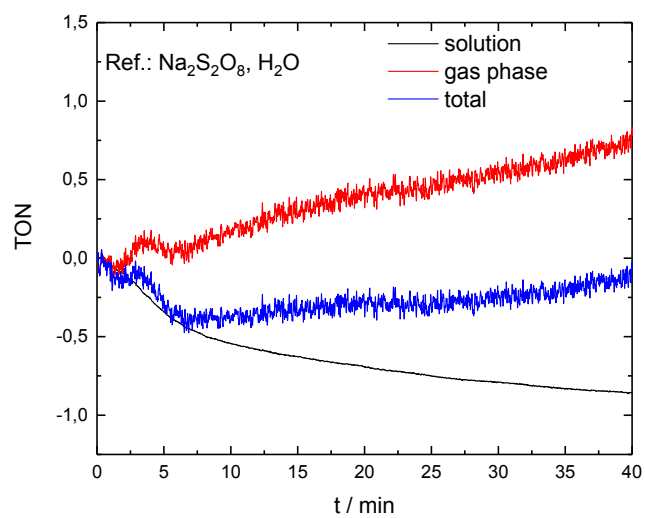

**Figure S9.** Negligible O<sub>2</sub>-evolution upon irradiation of an aqueous Na<sub>2</sub>S<sub>2</sub>O<sub>8</sub> solution (10 mM), containing no catalyst or photosensitizer.

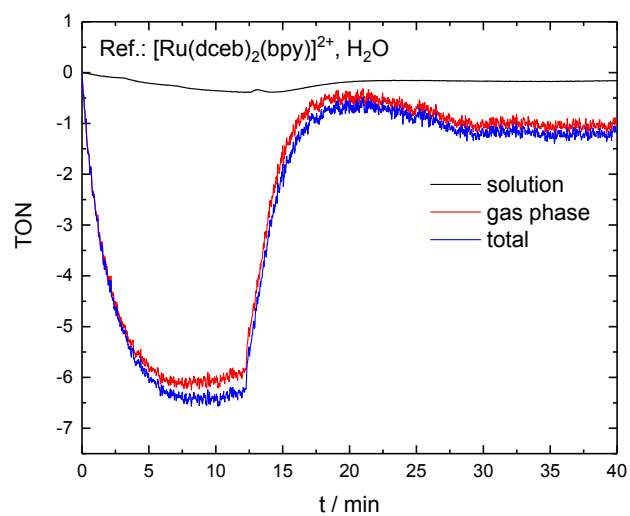

**Figure S10.** Negligible  $\text{O}_2$ -evolution upon irradiation of a  $[(\text{Ru}(\text{dceb})_2(\text{bpy}))(\text{PF}_6)_2]$  solution (0.3 mM) containing no persulfate.

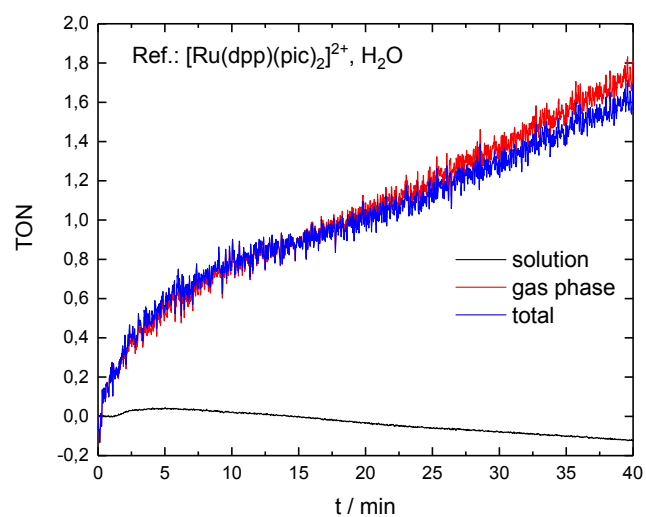

**Figure S11.** Negligible  $\text{O}_2$ -evolution upon irradiation of a  $[(\text{Ru}(\text{dpp})(\text{pic})_2)(\text{PF}_6)_2]$  solution (2.5  $\mu\text{M}$ ), with no peroxodisulfate and no photosensitizer.



## 5. Influence of Stirring

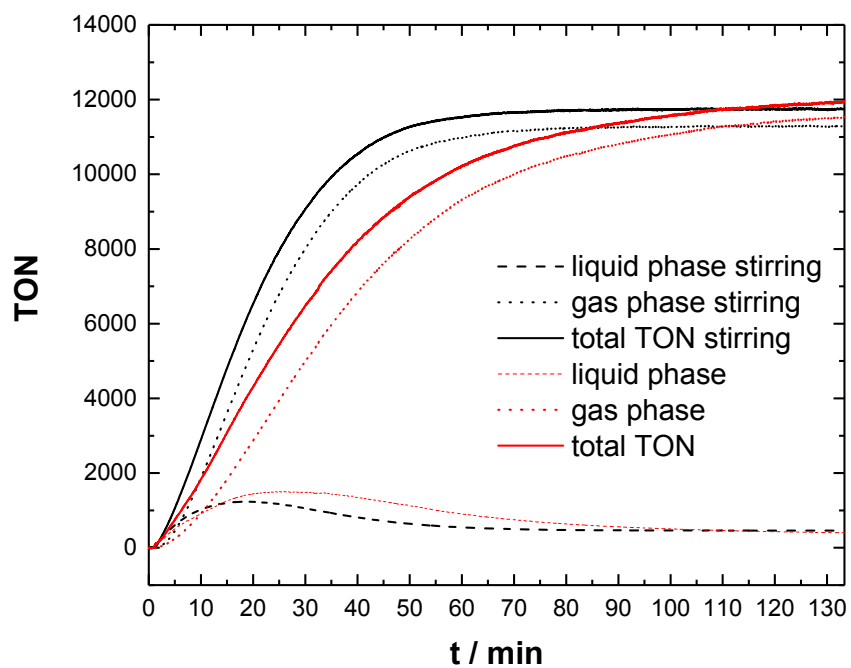

**Figure S12.** Influence of stirring a catalytic solution of  $\{\text{Mn}_4\text{V}_4\}$  ( $0.3 \mu\text{M}$ ),  $[\text{Ru}(\text{bpy})_3](\text{PF}_6)_2$  ( $1 \text{ mM}$ ) and  $\text{Na}_2\text{S}_2\text{O}_8$  ( $10 \text{ mM}$ ) in an MeCN/ $\text{H}_2\text{O}$  solution while being irradiated with two blue LED-sticks ( $\lambda_{\text{max}} = 470 \text{ nm}$ , ca.  $50 \text{ mW cm}^{-2}$ ).

## 6. Reproducibility

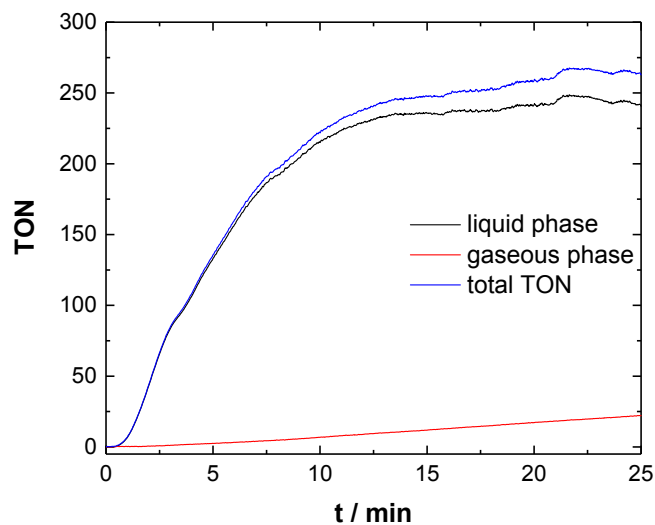

**Figure S13.** Light-driven oxygen evolution of the **Ru-WOC** system utilizing  $[\text{Ru}(\text{dceb})_2(\text{bpy})](\text{PF}_6)_2$  as photosensitizer. Conditions:  $[\text{Ru}(\text{dpp})(\text{pic})_2](\text{PF}_6)_2 = 2.6 \mu\text{M}$ ,  $\text{PS} = 0.3 \text{ mM}$ ,  $\text{Na}_2\text{S}_2\text{O}_8 = 10 \text{ mM}$ . Solvent: aqueous  $\text{Na}_2\text{SiF}_6/\text{NaHCO}_3$  buffer, pH 6.8,  $0.01 \text{ M Na}_2\text{SiF}_6$ . Irradiation: two LED-sticks,  $\lambda_{\text{max}} = 470 \text{ nm}$ , ca.  $50 \text{ mW cm}^{-2}$ .

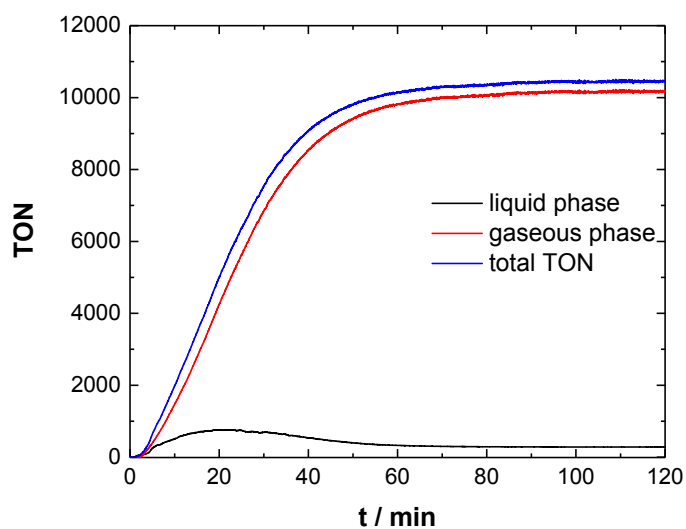

**Figure S14.** Light-driven  $\text{O}_2$  evolution in solution and gas-phase for the **{Mn<sub>4</sub>V<sub>4</sub>}** system utilizing  $[\text{Ru}(\text{bpy})_3](\text{PF}_6)_2$  as photosensitizer. Conditions: **{Mn<sub>4</sub>V<sub>4</sub>}** =  $0.3 \mu\text{M}$ ,  $\text{PS} = 1 \text{ mM}$ ,  $\text{Na}_2\text{S}_2\text{O}_8 = 10 \text{ mM}$  in  $\text{MeCN}/\text{H}_2\text{O}$  (9:1) using LED irradiation ( $\lambda_{\text{max}} = 470 \text{ nm}$ , ca.  $50 \text{ mW cm}^{-2}$ ).

## 7. Literature

- 1 G. Zhang, R. Zong, H. W. Tseng and R. P. Thummel, *Inorg. Chem.*, 2008, **47**, 990–998.
- 2 T. Kowacs, L. O'Reilly, Q. Pan, A. Huijser, P. Lang, S. Rau, W. R. Browne, M. T. Pryce and J. G. Vos, *Inorg. Chem.*, 2016, **55**, 2685–2690.
- 3 B. Schwarz, J. Forster, M. K. Goetz, D. Yücel, C. Berger, T. Jacob and C. Streb, *Angew. Chem. Int. Ed.*, 2016, **55**, 6329–6333.
- 4 J. T. Muckerman, M. Kowalczyk, Y. M. Badiei, D. E. Polyansky, J. J. Concepcion, R. Zong, R. P. Thummel and E. Fujita, *Inorg. Chem.*, 2014, **53**, 6904–6913.
